# Supplementary material
Source: Research Square preprint supplement (doi:10.21203/rs.3.rs-9190220/v1)
Supplement: Supplementary file 1 [file 12ef4a77a962711dba41f400.pdf]

## Questionnaire 1: Influence of Social Media on Dental Nutritional Knowledge of Parents

1. Do you think diet and nutrition, as discussed on social media, can have considerable influence on oral health?

- Strongly agree
- Agree
- Neutral
- Disagree
- Strongly Disagree

2. Do you think increased consumption of sugars, as often promoted on social media, can cause dental decay in children?

- Strongly agree
- Agree
- Neutral
- Disagree
- Strongly Disagree

3. Do you think that sticky sugars are more harmful for teeth than rapidly dissolving sugars, based on information from social media?

- Strongly agree
- Agree
- Neutral
- Disagree
- Strongly Disagree

4. Do you think frequent consumption of sugar-containing food, often advertised on social media, can cause dental decay?

- Strongly agree
- Agree
- Neutral
- Disagree
- Strongly Disagree

5. Do you think added sugars are more harmful than natural sugars, according to social media sources?

- Strongly agree
- Agree
- Neutral
- Disagree
- Strongly Disagree

6. Do you think consumption of fibrous food like fruits and vegetables can reduce dental decay, as promoted on social media?

- Strongly agree
- Agree
- Neutral

Disagree  
Strongly Disagree

7. Do you think milk and cheese are beneficial in preventing dental decay, based on social media information?

Strongly agree  
Agree  
Neutral  
Disagree  
Strongly Disagree

8. Do you think vitamin deficiencies can show oral manifestations, according to social media discussions?

Strongly agree  
Agree  
Neutral  
Disagree  
Strongly Disagree

9. Do you think packaged food, often advertised on social media, can cause increased incidence of dental decay?

Strongly agree  
Agree  
Neutral  
Disagree  
Strongly Disagree

10. Do you think aerated beverages, frequently featured on social media, can cause increased incidence of dental decay?

Strongly agree  
Agree  
Neutral  
Disagree  
Strongly Disagree

## Questionnaire 2: Influence of Social Media On Eating Behaviour in Children

11. How often do you provide sweet dishes to your child based on ideas seen on social media?

- Never
- Less Than Once A Week
- Once A Week
- More Than Once A Week
- Once A Day
- Everyday More Than Once

12. How often does your child consume sticky food, influenced by social media content?

- Never
- Less Than Once A Week
- Once A Week
- More Than Once A Week
- Once A Day
- Everyday More Than Once

13. How often does your child consume sugary beverages, as seen on social media?

- Never
- Less Than Once A Week
- Once A Week
- More Than Once A Week
- Once A Day
- Everyday More Than Once

14. How often do you give fibrous fruits to your child, as recommended on social media?

- Never
- Less Than Once A Week
- Once A Week
- More Than Once A Week
- Once A Day
- Everyday More Than Once

15. How often do you give vegetables and greens to your child, based on social media suggestions?

- Never
- Less Than Once A Week
- Once A Week
- More Than Once A Week
- Once A Day
- Everyday More Than Once

16.How frequently does your child consume milk products, influenced by social media?

- Never
- Less Than Once A Week
- Once A Week
- More Than Once A Week
- Once A Day
- Everyday More Than Once

17.How often does your child consume cereal products, based on social media ideas?

- Never
- Less Than Once A Week
- Once A Week
- More Than Once A Week
- Once A Day
- Everyday More Than Once

18.What is the frequency of fish and meat consumption in your child, as influenced by social media?

- Never
- Less Than Once A Week
- Once A Week
- More Than Once A Week
- Once A Day
- Everyday More Than Once
