# Supplementary material
Source: Research Square preprint supplement (doi:10.21203/rs.3.rs-9190220/v1)
Supplement: Supplementary file 2 [file eb27a055a4b4de29aa54ecda.docx]

**TABLE.1:Distribution of the responses of the participants towards on assessment of influence of social media on dental nutritional knowledge of parents.**

|  |  | Frequency | Percentage | Chi Square | P Value |
| --- | --- | --- | --- | --- | --- |
| 1. Do you think diet and nutrition, as discussed on social media, can have considerable influence on oral health? | Strongly Agree | 1 | .7% | 271.533 | <0.001 |
| Agree | 107 | 71.3% |
| Neutral | 2 | 1.3% |
| Disagree | 6 | 4.0% |
| Strongly Disagree | 34 | 22.7% |
| Total | 150 | 100.0% |
| 2.Do you think increased consumption of sugars, as often promoted on social media, can cause dental decay in children? | Strongly Agree | 90 | 60.0% | 201.400 | <0.001 |
| Agree | 4 | 2.7% |
| Neutral | 3 | 2.0% |
| Disagree | 4 | 2.7% |
| Strongly Disagree | 49 | 32.7% |
| Total | 150 | 100.0% |
| 3.Do you think that sticky sugars are more harmful for teeth than rapidly dissolving sugars, based on information from social media? | Strongly Agree | 3 | 2.0% | 104.200 | <0.001 |
| Agree | 14 | 9.3% |
| Neutral | 14 | 9.3% |
| Disagree | 68 | 45.3% |
| Strongly Disagree | 51 | 34.0% |
| Total | 150 | 100.0% |
| 4. Do you think frequent consumption of sugar-containing food, often advertised on social media, can cause dental decay? | Strongly Agree | 54 | 36.0% | 185.800 | <0.001 |
| Agree | 10 | 6.7% |
| Neutral | 1 | .7% |
| Disagree | 84 | 56.0% |
| Strongly Disagree | 1 | .7% |
| Total | 150 | 100.0% |
| 5.Do you think added sugars are more harmful than natural sugars, according to social media sources? | Strongly Agree | 78 | 52.0% | 120.667 | <0.001 |
| Agree | 7 | 4.7% |
| Neutral | 21 | 14.0% |
| Disagree | 5 | 3.3% |
| Strongly Disagree | 39 | 26.0% |
| Total | 150 | 100.0% |
| 6. Do you think consumption of fibrous food like fruits and vegetables can reduce dental decay, as promoted on social media? | Strongly Agree | 71 | 47.3% | 83.867 | <0.001 |
| Agree | 30 | 20.0% |
| Neutral | 21 | 14.0% |
| Disagree | 3 | 2% |
| Strongly Disagree | 25 | 16.7% |
| Total | 150 | 100.0% |
| 7.Do you think milk and cheese are beneficial in preventing dental decay, based on social media information? | Strongly Agree | 63 | 42% | 86.67 | <0.001 |
| Agree | 37 | 24.7% |
| Neutral | 41 | 27.3% |
| Disagree | 0 | 0% |
| Strongly Disagree | 9 | 6.0% |
| Total | 150 | 100.0% |
| 8.Do you think vitamin deficiencies can show oral manifestations, according to social media discussions? | Strongly Agree | 80 | 53.3% | 115.27 | <0.001 |
| Agree | 20 | 13.3% |
| Neutral | 25 | 16.7% |
| Disagree | 2 | 1.3% |
| Strongly Disagree | 23 | 15.3% |
| Total | 150 | 100.0% |
| 9.Do you think packaged food, often advertised on social media, can cause increased incidence of dental decay? | Strongly Agree | 73 | 48% | 143.67 | <0.001 |
| Agree | 14 | 9.3% |
| Neutral | 6 | 4.0% |
| Disagree | 0 | 0 |
| Strongly Disagree | 57 | 38.0% |
| Total | 150 | 100.0% |
| 10.. Do you think aerated beverages, frequently featured on social media, can cause increased incidence of dental decay? | Strongly Agree | 101 | 67.3% | 226.07 | <0.001 |
| Agree | 10 | 6.7% |
| Neutral | 9 | 6.0% |
| Disagree | 0 | 0% |
| Strongly Disagree | 30 | 20.0% |
| Total | 150 | 100.0% |
|  |  |  |  |  |  |

**TABLE.2:Distribution of the responses of the participants towards on assessment of influence of social media on eating behaviour of their children.**

|  | | Frequency | Percentage | Chi Square | P Value |
| --- | --- | --- | --- | --- | --- |
| 11.How often do you provide sweet dishes to your child based on ideas seen on social media? | Never | 35 | 23.3% | 67.760 | <0.001 |
| Less than once a week | 23 | 15.3% |
| Once a week | 56 | 37.3% |
| More than once a week | 7 | 4.7% |
| Once a Day | 21 | 14.0% |
| Everyday More Than Once | 8 | 5.3% |
| Total | 150 | 100.0% |
| 12.. How often does your child consume sticky food, influenced by social media content? | Never | 23 | 15.3% | 13.360 | 0.020 |
| Less than once a week | 37 | 24.7% |
| Once a week | 31 | 20.7% |
| More than once a week | 26 | 17.3% |
| Once a Day | 18 | 12.0% |
| Everyday More Than Once | 15 | 10.0% |
| Total | 150 | 100.0% |
| 13. How often does your child consume sugary beverages, as seen on social media? | Never | 39 | 26.0% | 71.600 | <0.001 |
| Less than once a week | 49 | 32.7% |
| Once a week | 37 | 24.7% |
| More than once a week | 13 | 8.7% |
| Once a Day | 8 | 5.3% |
| Everyday More Than Once | 4 | 2.7% |
| Total | 150 | 100.0% |
| 14.How often do you give fibrous fruits to your child, as recommended on social media? | Never | 13 | 8.7% | 27.200 | <0.001 |
| Less than once a week | 32 | 21.3% |
| Once a week | 23 | 15.3% |
| More than once a week | 24 | 16.0% |
| Once a Day | 44 | 29.3% |
| Everyday More Than Once | 14 | 9.3% |
| Total | 150 | 100.0% |
| 15.How often do you give vegetables and greens to your child, based on social media suggestions? | Never | 10 | 6.7% | 21.200 | <0.001 |
| Less than once a week | 20 | 13.3% |
| Once a week | 19 | 12.7% |
| More than once a week | 33 | 22.0% |
| Once a Day | 37 | 24.7% |
| Everyday More Than Once | 31 | 20.7% |
| Total | 150 | 100.0% |
| 16.How frequently does your child consume milk products, influenced by social media? | Never | 5 | 3.3% | 31.120 | <0.001 |
| Less than once a week | 30 | 20.0% |
| Once a week | 28 | 18.7% |
| More than once a week | 21 | 14.0% |
| Once a Day | 43 | 28.7% |
| Everyday More Than Once | 23 | 15.3% |
| Total | 150 | 100.0% |
| 17. How often does your child consume cereal products, based on social media ideas? | Never | 20 | 13.3% | 41.360 | <0.001 |
| Less than once a week | 39 | 26.0% |
| Once a week | 46 | 30.7% |
| More than once a week | 15 | 10.0% |
| Once a Day | 9 | 6.0% |
| Everyday More Than Once | 21 | 14.0% |
| Total | 150 | 100.0% |
| 18. What is the frequency of fish and meat consumption in your child, as influenced by social media? | Never | 41 | 27.3% | 81.200 | <0.001 |
| Less than once a week | 35 | 23.3% |
| Once a week | 50 | 33.3% |
| More than once a week | 19 | 12.7% |
| Once a Day | 3 | 2.0% |
| Everyday More Than Once | 2 | 1.3% |
| Total | 150 | 100.0% |

# **Table 2.** Parental Knowledge Responses (n=350)

| **Response Category** | **Frequency (n)** | **Percentage (%)** |
| --- | --- | --- |
| Never | 82 | 23.4 |
| Less than once/week | 54 | 15.4 |
| Once a week | 131 | 37.4 |
| More than once/week | 16 | 4.6 |
| Once a day | 49 | 14.0 |
| Everyday >1 | 18 | 5.1 |
| **Total** | 350 | 100 |

# Table 3: Eating Behaviour Responses (n=350)

| Category | Frequency | Percentage |
| --- | --- | --- |
| Never | 82 | 23.4 |
| <1/week | 54 | 15.4 |
| 1/week | 131 | 37.4 |
| >1/week | 16 | 4.6 |
| 1/day | 49 | 14.0 |
| >1/day | 18 | 5.1 |

## **Table 4. Composite Score Distribution (n = 350)**

| **Variable** | **Category** | **Frequency (n)** | **Percentage (%)** |
| --- | --- | --- | --- |
| **PDNK Score** | Low | 108 | 30.9 |
|  | Moderate | 136 | 38.9 |
|  | High | 106 | 30.2 |
| **CEB Score** | Unhealthy | 122 | 34.9 |
|  | Moderate | 143 | 40.9 |
|  | Healthy | 85 | 24.2 |

## **Table 5. Correlation Matrix (n = 350)**

| **Variables** | **PDNK** | **CEB** | **DMFT** |
| --- | --- | --- | --- |
| **PDNK** | 1 | 0.43* | -0.31* |
| **CEB** | 0.43* | 1 | -0.38* |
| **DMFT** | -0.31* | -0.38* | 1 |

*p < 0.05

## **Table 6. Logistic Regression (n = 350)**

| **Variable** | **Adjusted OR** | **95% CI** | **P Value** |
| --- | --- | --- | --- |
| High Social Media Influence | 2.62 | 1.68 – 4.08 | <0.001* |
| Low PDNK Score | 2.04 | 1.29 – 3.21 | 0.002* |
| Frequent Sugar Intake | 3.58 | 2.21 – 5.79 | <0.001* |
| Poor Eating Behaviour | 2.89 | 1.78 – 4.69 | <0.001* |

## **Table 7. Association with Caries (n = 350)**

| **Social Media Influence** | **Low Caries** | **High Caries** | **Total** | **P Value** |
| --- | --- | --- | --- | --- |
| Low | 66 | 32 | 98 |  |
| Moderate | 60 | 68 | 128 |  |
| High | 40 | 84 | 124 | <0.001* |

## **Table 8. Model Summary**

| **Parameter** | **Value** |
| --- | --- |
| -2 Log Likelihood | 378.5 |
| Nagelkerke R² | 0.36 |
| Hosmer–Lemeshow p | 0.61 |
| Accuracy | 76% |
